# Supplementary material for: Genomic Prediction across Structured Hybrid Populations and Environments in Maize
Source: MDPI journal article supplement (doi:10.3390/plants10061174), 2021-06-09
Supplement: s1 [file s1]

**Table S2** Variance component dissection by using single- and multi-environment yield data

| Environment | $\sigma_g^2$ | $\sigma_{ge}^2$ | $\sigma_\varepsilon^2$ | e | r | $H^2$ |
|-------------|--------------|-----------------|------------------------|---|---|-------|
| BJ          | 203.51       | /               | 264.02                 | 1 | 2 | 0.61  |
| XJ          | 234.17       | /               | 199.73                 | 1 | 2 | 0.70  |
| HN          | 105.19       | /               | 138.13                 | 1 | 2 | 0.60  |
| BJ-XJ-HN    | 125.20       | 54.40           | 203.60                 | 3 | 2 | 0.71  |

Note:  $\sigma_g^2$  indicates variance of genotype;  $\sigma_{ge}^2$  indicates variance of genotype-by-environment;  $\sigma_\varepsilon^2$  indicates variance of error; e and r are the number of environments and replicates, respectively;  $H^2$  indicates broad sense heritability; / indicates  $\sigma_{ge}^2$  can't be estimated using single-environment data
