# Supplementary material for: Genomic Prediction across Structured Hybrid Populations and Environments in Maize
Source: MDPI journal article supplement (doi:10.3390/plants10061174), 2021-06-09
Supplement: s1 [file s1]

**Table S1** Phenotypic correlation coefficients among yield of each population in three environments

|    | Population 1 |         | Population 2 |         | Population 3 |                    | Population 4 |         |
|----|--------------|---------|--------------|---------|--------------|--------------------|--------------|---------|
|    | XJ           | HN      | XJ           | HN      | XJ           | HN                 | XJ           | HN      |
| BJ | 0.31***      | 0.32*** | 0.50***      | 0.41*** | 0.36**       | 0.30*              | 0.38**       | 0.37**  |
| XJ |              | 0.41*** |              | 0.46*** |              | 0.24 <sup>ns</sup> |              | 0.57*** |

Note: \*\*\* indicates  $P < 0.001$ ; \*\* indicates  $P < 0.01$ ; \* indicates  $P < 0.05$ ; ns indicates not significant.

BJ, XJ and HN indicate three environments
