# Supplementary material for: Genomic Prediction across Structured Hybrid Populations and Environments in Maize
Source: MDPI journal article supplement (doi:10.3390/plants10061174), 2021-06-09
Supplement: s1 [file s1]

**Table S3** Two cross validation schemes – CV1 and CV2

|         | CV1  |      | CV2  |      |
|---------|------|------|------|------|
|         | Env1 | Env2 | Env1 | Env2 |
| Line_1  | No   | No   | No   | Yes  |
| Line_2  | No   | No   | No   | Yes  |
| Line_3  | No   | No   | No   | Yes  |
| Line_4  | No   | No   | No   | Yes  |
| Line_5  | Yes  | Yes  | Yes  | Yes  |
| Line_6  | Yes  | Yes  | Yes  | Yes  |
| Line_7  | Yes  | Yes  | Yes  | No   |
| Line_8  | Yes  | Yes  | Yes  | No   |
| Line_9  | Yes  | Yes  | Yes  | No   |
| Line_10 | Yes  | Yes  | Yes  | No   |
| Line_11 | Yes  | Yes  | Yes  | Yes  |
| Line_12 | Yes  | Yes  | Yes  | Yes  |
| Line_13 | Yes  | Yes  | Yes  | Yes  |
| ...     | Yes  | Yes  | Yes  | Yes  |
| Line_n  | Yes  | Yes  | Yes  | Yes  |

Env indicates environment; Line\_1 to Line\_n indicated different lines of the population; Yes indicates these lines have both genotype and phenotype data; No indicates these lines only have genotype data
