# Supplementary material for: Genomic Prediction across Structured Hybrid Populations and Environments in Maize
Source: MDPI journal article supplement (doi:10.3390/plants10061174), 2021-06-09
Supplement: s1 [file s1]

**Table S4** PAs of SE, AE and  $G \times E$  model

| CV schemes | Training dataset | validation dataset | SE           | AE           | $G \times E$ |
|------------|------------------|--------------------|--------------|--------------|--------------|
| CV1        | BJ_XJ            | BJ                 | 0.641(0.053) | 0.645(0.053) | 0.650(0.052) |
|            |                  | XJ                 | 0.736(0.046) | 0.727(0.044) | 0.737(0.045) |
|            | BJ_HN            | BJ                 | 0.634(0.052) | 0.616(0.059) | 0.638(0.052) |
|            |                  | HN                 | 0.621(0.064) | 0.534(0.076) | 0.621(0.067) |
|            | XJ_HN            | XJ                 | 0.739(0.039) | 0.721(0.042) | 0.744(0.039) |
|            |                  | HN                 | 0.631(0.053) | 0.551(0.057) | 0.636(0.053) |
|            | BJ_XJ_HN         | BJ                 | 0.630(0.048) | 0.624(0.050) | 0.639(0.050) |
|            |                  | XJ                 | 0.733(0.040) | 0.722(0.043) | 0.739(0.040) |
|            |                  | HN                 | 0.622(0.053) | 0.522(0.062) | 0.621(0.053) |
| CV2        | BJ_XJ            | BJ                 | 0.639(0.046) | 0.664(0.043) | 0.671(0.042) |
|            |                  | XJ                 | 0.739(0.034) | 0.747(0.033) | 0.758(0.032) |
|            | BJ_HN            | BJ                 | 0.644(0.046) | 0.640(0.047) | 0.659(0.043) |
|            |                  | HN                 | 0.634(0.050) | 0.561(0.054) | 0.650(0.048) |
|            | XJ_HN            | XJ                 | 0.741(0.069) | 0.729(0.09)  | 0.756(0.062) |
|            |                  | HN                 | 0.631(0.047) | 0.574(0.053) | 0.663(0.047) |
|            | BJ_XJ_HN         | BJ                 | 0.642(0.038) | 0.663(0.037) | 0.678(0.033) |
|            |                  | XJ                 | 0.739(0.035) | 0.753(0.033) | 0.769(0.030) |
|            |                  | HN                 | 0.622(0.046) | 0.543(0.053) | 0.651(0.049) |

Note: Training and validation datasets contain YPP data in the indicated environments. For example, in the first row of “Training dataset” column, BJ\_XJ indicates that lines in BJ and XJ were used as the training population, and BJ indicates that lines in BJ were used as the validation population. The GP model were run with five-fold CV for 100 repeats, data in the column of “SE”, “AE”, and “ $G \times E$ ” are the mean values of the 100 repeats, and the values in the brackets are the standard deviation of 100 repeats. CV1 and CV2 schemes are shown in Table S3
