# Supplementary material for: Genomic Prediction across Structured Hybrid Populations and Environments in Maize
Source: MDPI journal article supplement (doi:10.3390/plants10061174), 2021-06-09
Supplement: s1 [file s1]

**Table S5** Genetic information of the parental lines of population 4

| Lines of population 4 | Generation of parental lines | Sources                     |
|-----------------------|------------------------------|-----------------------------|
| pop4_5974             | F <sub>3</sub>               | Hybrid variety <sup>2</sup> |
| pop4_5893             | F <sub>4</sub>               | Hybrid variety <sup>2</sup> |
| pop4_5899             | F <sub>4</sub>               | Hybrid variety <sup>2</sup> |
| pop4_5903             | F <sub>4</sub>               | Hybrid variety <sup>2</sup> |
| pop4_5907             | F <sub>4</sub>               | Hybrid variety <sup>2</sup> |
| pop4_5915             | F <sub>4</sub>               | Hybrid variety <sup>2</sup> |
| pop4_5918             | F <sub>4</sub>               | Hybrid variety <sup>2</sup> |
| pop4_5925             | F <sub>4</sub>               | Hybrid variety <sup>2</sup> |
| pop4_5930             | F <sub>4</sub>               | Hybrid variety <sup>2</sup> |
| pop4_5954             | F <sub>4</sub>               | Hybrid variety <sup>2</sup> |
| pop4_5958             | F <sub>4</sub>               | Hybrid variety <sup>2</sup> |
| pop4_5962             | F <sub>4</sub>               | Hybrid variety <sup>2</sup> |
| pop4_5966             | F <sub>4</sub>               | Hybrid variety <sup>2</sup> |
| pop4_5978             | F <sub>4</sub>               | Hybrid variety <sup>2</sup> |
| pop4_5982             | F <sub>4</sub>               | Hybrid variety <sup>2</sup> |
| pop4_5991             | F <sub>4</sub>               | Hybrid variety <sup>2</sup> |
| pop4_5994             | F <sub>4</sub>               | Hybrid variety <sup>2</sup> |
| pop4_5999             | F <sub>4</sub>               | Hybrid variety <sup>2</sup> |
| pop4_6003             | F <sub>4</sub>               | Hybrid variety <sup>2</sup> |
| pop4_6014             | F <sub>4</sub>               | Hybrid variety <sup>2</sup> |
| pop4_5895             | F <sub>5</sub>               | Hybrid variety <sup>2</sup> |
| pop4_5910             | F <sub>5</sub>               | Hybrid variety <sup>2</sup> |
| pop4_5922             | F <sub>5</sub>               | Hybrid variety <sup>2</sup> |
| pop4_5939             | F <sub>5</sub>               | Hybrid variety <sup>2</sup> |
| pop4_5942             | F <sub>5</sub>               | Hybrid variety <sup>2</sup> |
| pop4_5946             | F <sub>5</sub>               | Hybrid variety <sup>2</sup> |
| pop4_5950             | F <sub>5</sub>               | Hybrid variety <sup>2</sup> |
| pop4_5971             | F <sub>5</sub>               | Hybrid variety <sup>2</sup> |
| pop4_5986             | F <sub>5</sub>               | Hybrid variety <sup>2</sup> |
| pop4_6007             | F <sub>5</sub>               | Hybrid variety <sup>2</sup> |
| pop4_6010             | F <sub>5</sub>               | Hybrid variety <sup>2</sup> |
| pop4_6019             | F <sub>5</sub>               | Hybrid variety <sup>2</sup> |
| pop4_6023             | F <sub>5</sub>               | Hybrid variety <sup>2</sup> |
| pop4_6046             | F <sub>5</sub>               | Hybrid variety <sup>2</sup> |
| pop4_6055             | F <sub>5</sub>               | Hybrid variety <sup>2</sup> |
| pop4_6059             | F <sub>5</sub>               | Hybrid variety <sup>2</sup> |
| pop4_6067             | F <sub>5</sub>               | Hybrid variety <sup>2</sup> |
| pop4_6071             | F <sub>5</sub>               | Hybrid variety <sup>2</sup> |

|           |                             |                             |
|-----------|-----------------------------|-----------------------------|
| pop4_6089 | F <sub>5</sub>              | Hybrid variety <sup>2</sup> |
| pop4_5810 | F <sub>n</sub> <sup>1</sup> | Hybrid variety <sup>2</sup> |
| pop4_5814 | F <sub>n</sub>              | Hybrid variety <sup>2</sup> |
| pop4_5819 | F <sub>n</sub>              | Hybrid variety <sup>2</sup> |
| pop4_5823 | F <sub>n</sub>              | Hybrid variety <sup>2</sup> |
| pop4_5827 | F <sub>n</sub>              | Hybrid variety <sup>2</sup> |
| pop4_5831 | F <sub>n</sub>              | Hybrid variety <sup>2</sup> |
| pop4_5834 | F <sub>n</sub>              | Hybrid variety <sup>2</sup> |
| pop4_5838 | F <sub>n</sub>              | Hybrid variety <sup>2</sup> |
| pop4_5842 | F <sub>n</sub>              | Hybrid variety <sup>2</sup> |
| pop4_5846 | F <sub>n</sub>              | Hybrid variety <sup>2</sup> |
| pop4_5850 | F <sub>n</sub>              | Hybrid variety <sup>2</sup> |
| pop4_5854 | F <sub>n</sub>              | Hybrid variety <sup>2</sup> |
| pop4_5858 | F <sub>n</sub>              | Hybrid variety <sup>2</sup> |
| pop4_5862 | F <sub>n</sub>              | Hybrid variety <sup>2</sup> |
| pop4_5866 | F <sub>n</sub>              | Hybrid variety <sup>2</sup> |
| pop4_5870 | F <sub>n</sub>              | Hybrid variety <sup>2</sup> |
| pop4_5874 | F <sub>n</sub>              | Hybrid variety <sup>2</sup> |
| pop4_5878 | F <sub>n</sub>              | Hybrid variety <sup>2</sup> |
| pop4_5882 | F <sub>n</sub>              | Hybrid variety <sup>2</sup> |
| pop4_5886 | F <sub>n</sub>              | Hybrid variety <sup>2</sup> |
| pop4_5935 | F <sub>n</sub>              | Hybrid variety <sup>2</sup> |
| pop4_6026 | F <sub>n</sub>              | Hybrid variety <sup>2</sup> |
| pop4_6031 | F <sub>n</sub>              | Hybrid variety <sup>2</sup> |
| pop4_6051 | F <sub>n</sub>              | Hybrid variety <sup>2</sup> |
| pop4_6062 | F <sub>n</sub>              | Hybrid variety <sup>2</sup> |
| pop4_6074 | F <sub>n</sub>              | Hybrid variety <sup>2</sup> |
| pop4_6078 | F <sub>n</sub>              | Hybrid variety <sup>2</sup> |
| pop4_6083 | F <sub>n</sub>              | Hybrid variety <sup>2</sup> |
| pop4_5806 | F <sub>n</sub>              | Hybrid variety <sup>2</sup> |

Note: Note: 1, the subscript n is an integer  $\geq 6$ ; 2, the parental lines were selected from different hybrid varieties.
